# Supplementary material for: Dynamic remodeling of septin structures fine-tunes myogenic differentiation
Source: PubMed Central journal article supplement (PMC11380178; doi:10.1016/j.isci.2024.110630), 2024-07-31
Supplement: mmc1.pdf [file mmc1.pdf]

iScience, Volume 27

## **Supplemental information**

### **Dynamic remodeling of septin structures**

#### **fine-tunes myogenic differentiation**

**Vladimir Ugorets, Paul-Lennard Mendez, Dmitrii Zagrebin, Giulia Russo, Yannic Kerkhoff, Georgios Kotsaris, Jerome Jatzlau, Sigmar Stricker, and Petra Knaus**

## Supplementary Figures

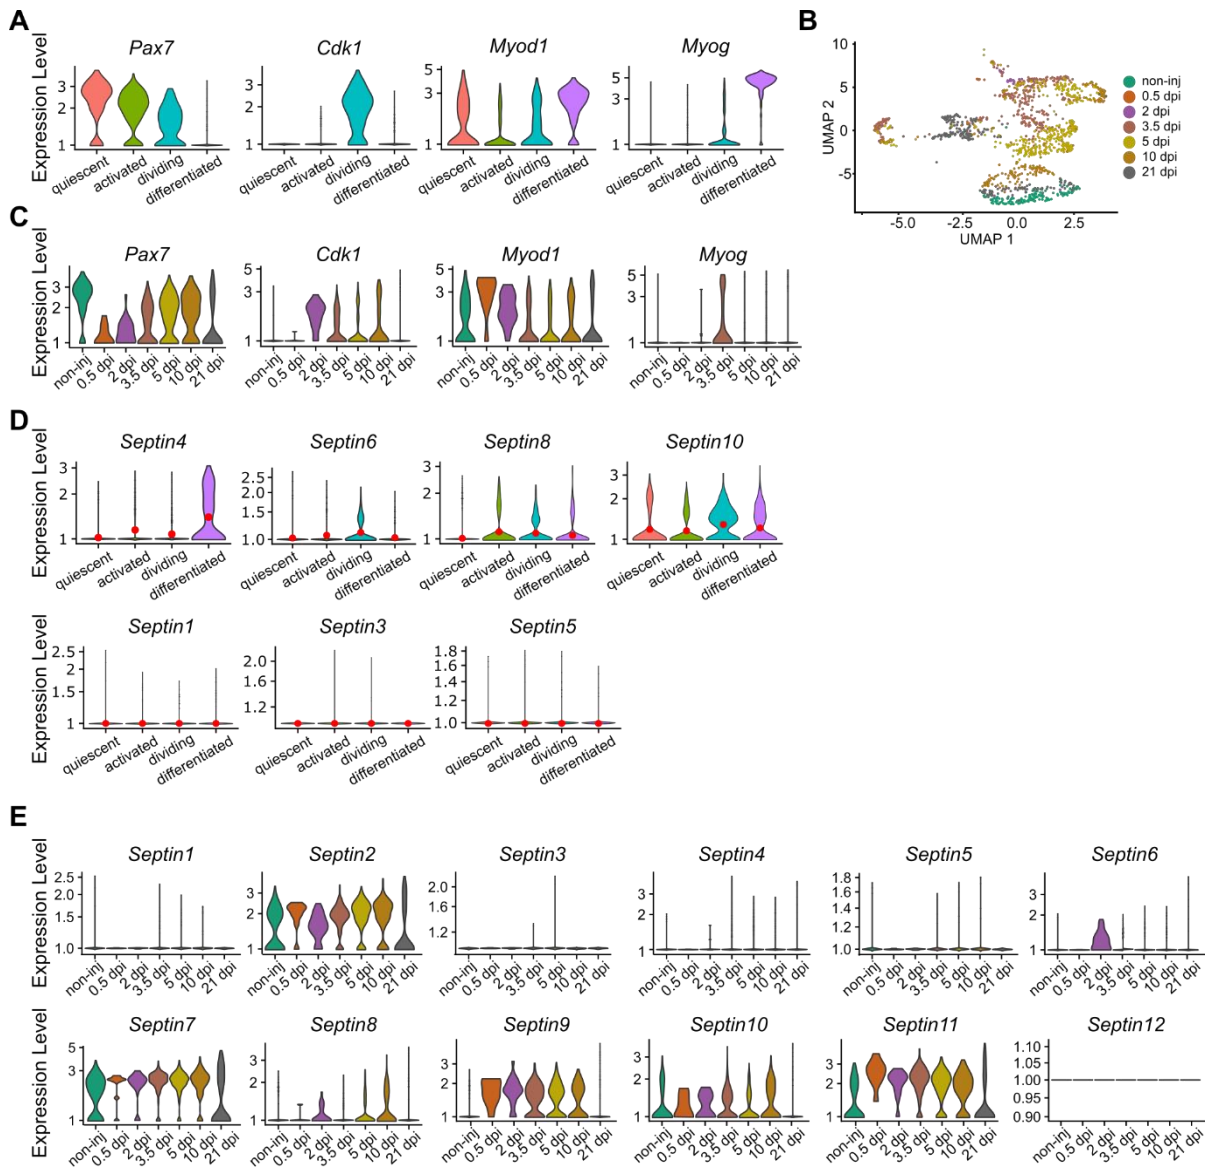

Figure S1 Transcriptional landscape of septins in the population of MuSCs during muscle regeneration, Related to Figure 1.

Single cell RNA sequencing data of non-injured tibialis anterior muscle and additional six time points following cardiotoxin injury (CTX)<sup>1</sup>. **A** Violin plots representing subcluster-specific gene expression colored by cluster identity. **B** UMAP visualization of the sub-cluster MuSC in regenerating musculature colored by time points within the sub-cluster. **C** Violin plots representing subcluster-specific gene expression colored by time points. **D** Violin plots showing time point specific expression of septins during muscle regeneration. **D** Violin plots representing gene expression profiles of *Septin1*, *3*, *4*, *5*, *6*, *8* and *10* in MuSC subclusters. **E** Violin plots representing subcluster-specific gene expression of all septins colored by experimental time points.

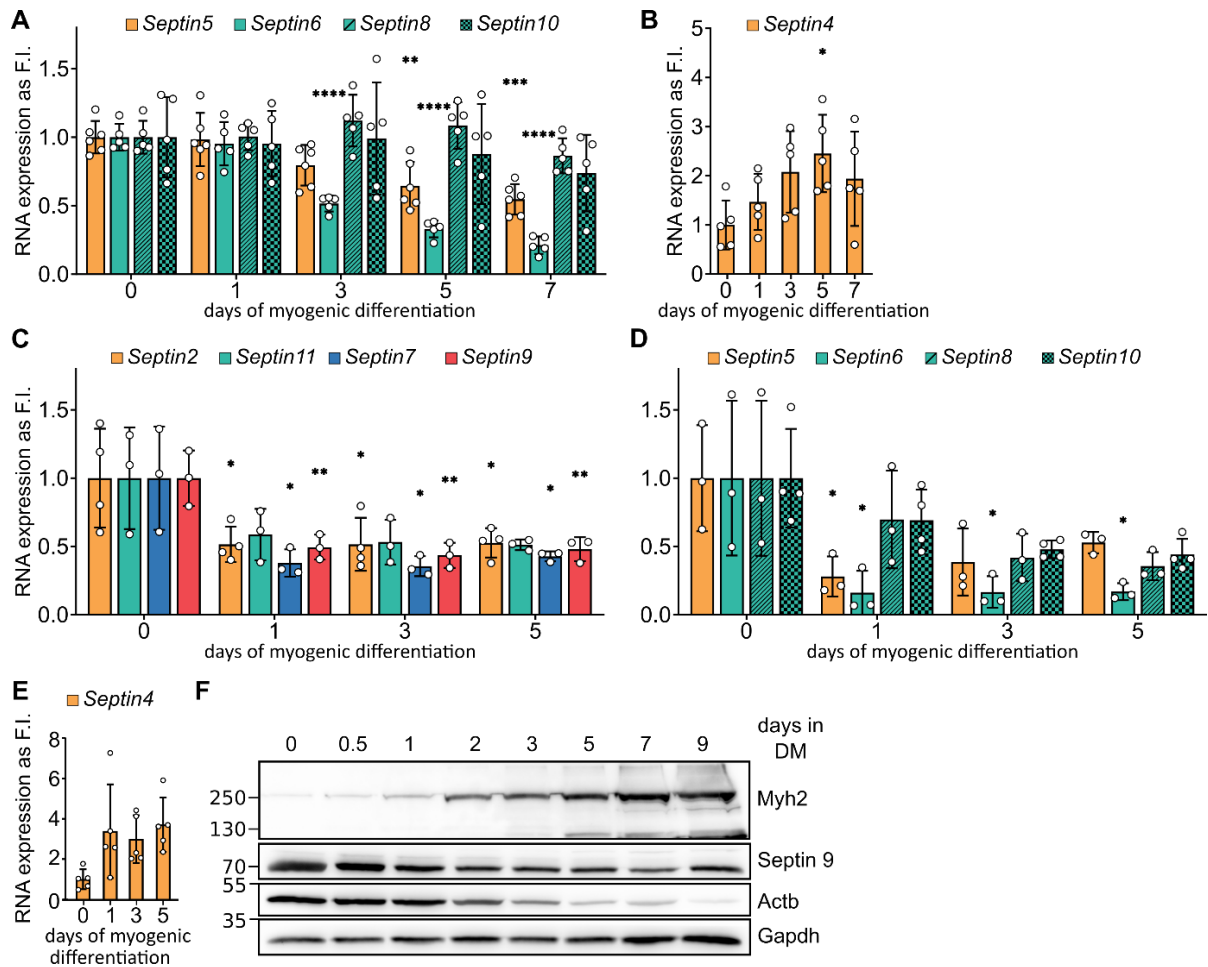

Figure S2 Expression of septins during myogenic differentiation in C2C12 cells and primary myoblasts, Related to Figure 1.

**A-B** mRNA expression levels of *Septin5*, *6*, *8*, *10* and *4* during C2C12 differentiation. **C-E** mRNA expression levels of core myogenic septins (C) and other expressed septin subunits (D-E) during 5 days of myogenic differentiation in primary myoblasts. **F** Representative western blot of Septin9 during 9 days of myogenic differentiation in primary myoblasts. Data represent mean  $\pm$  standard deviation (SD), \* $p < 0.05$ , \*\* $p < 0.01$ , \*\*\* $p < 0.001$ , \*\*\*\* $p < 0.0001$  from one way ANOVA followed by Dunnett's multiple comparison test.

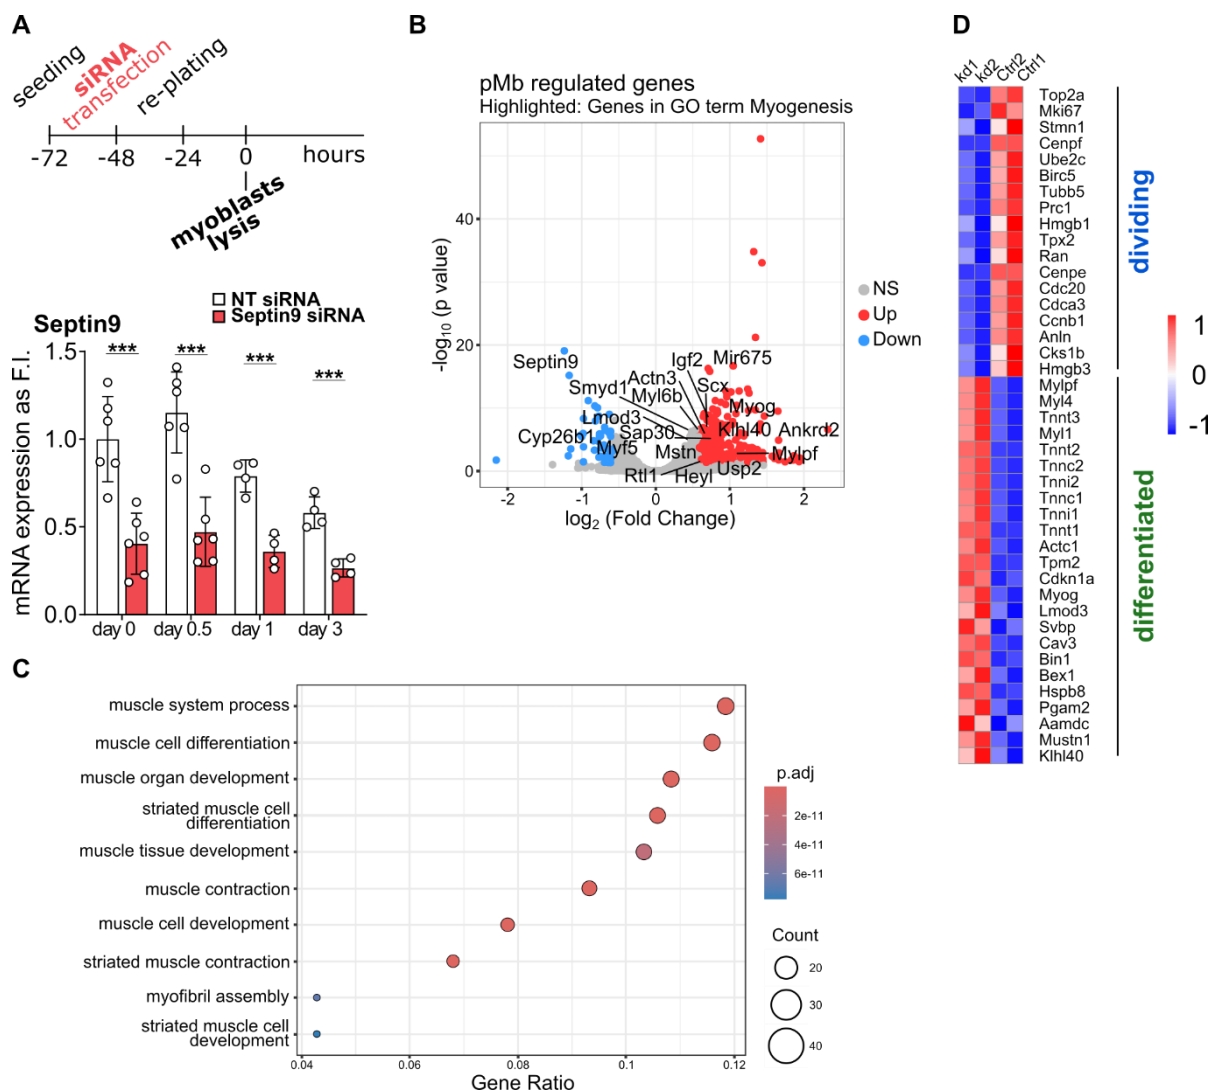

Figure S3 Septin9 depletion induces transition from cycling towards committed cells in primary myoblasts, Related to Figure 2.

**A** Schematic representation of the experimental setup. Total RNA was isolated from proliferating myoblasts 48 hours after Septin9 knockdown. Septin9 knockdown efficiency validation over 3 days of *in vitro* myogenic differentiation via qRT-PCR in primary myoblasts. **B** Volcano plot of DE genes (adjusted p value < 0.05;  $-0.585 \leq \log_2FC \leq 0.585$ ) of primary myoblasts transfected with either non-targeting siRNA (control) or Septin9 siRNA after in growth medium, genes corresponding to Gene Ontology term “Myogenesis” are highlighted. **C** GO enrichment analysis of genes upregulated in Septin9-deficient primary myoblasts. **D** Heat map depicting marker genes for dividing and differentiated MuSCs defined by scRNAseq data depicted in Figure 1. Genes are filtered for significant regulation in primary myoblasts (adjusted p value < 0.05). Data represent mean  $\pm$  standard deviation (SD), \*p < 0.05, \*\*p < 0.01, \*\*\*p < 0.001, \*\*\*\*p < 0.0001 from two-sided unpaired t test.

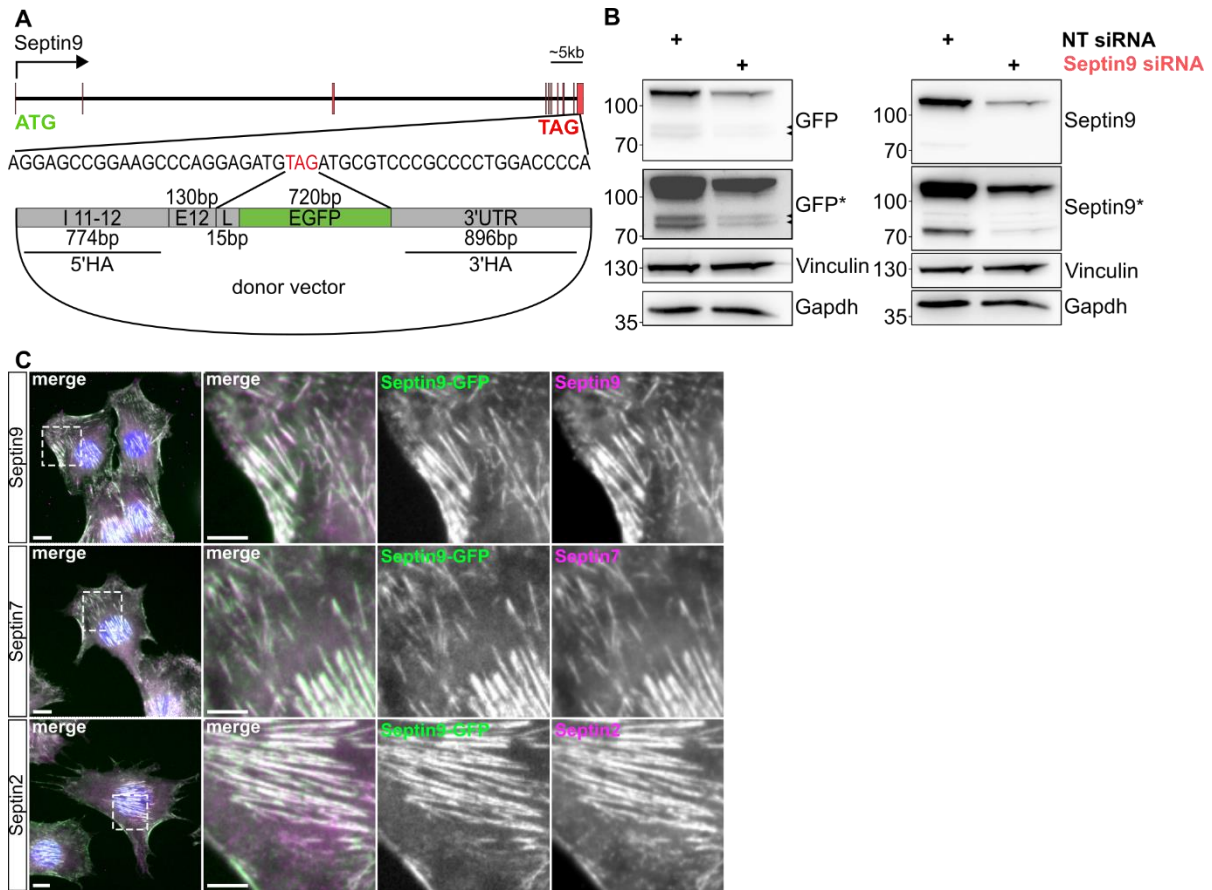

Figure S4 Generation and validation of a Septin9-GFP C2C12 cell line, Related to Figure 4.

**A** Cloning strategy introducing a 15bp linker (L) and an EGFP sequence instead of the stop codon of Septin9 in C2C12 cells. C-terminal strategy targets all Septin9 isoforms. Several clones were generated and tested. **B** Clone 32 was transfected with either non-targeting siRNA or Septin9 siRNA and subjected to a SDS PAGE analysis followed by a western blot. Antibodies against long Septin9 isoforms (run above 70kDa) and GFP were used to validate the knock-in. The molecular weight shift of about 30kDa (GFP) is visible with both antibodies. Probing the membrane with anti-GFP antibody might reveal the expression of the short isoforms (black arrow heads). Lanes marked with an asterisk (GFP\* and Septin9\*) represent longer exposure. **C** Representative epifluorescent images of proliferating Septin9-GFP C2C12 cells (clone#32) visualizing co-localization of Septin9-GFP with endogenous septin structures. Septin9-GFP shows knock-in GFP signal, Septin9, Septin7 and Septin2 are stained with antibodies. Scale bar 10  $\mu$ m, insets 5  $\mu$ m.

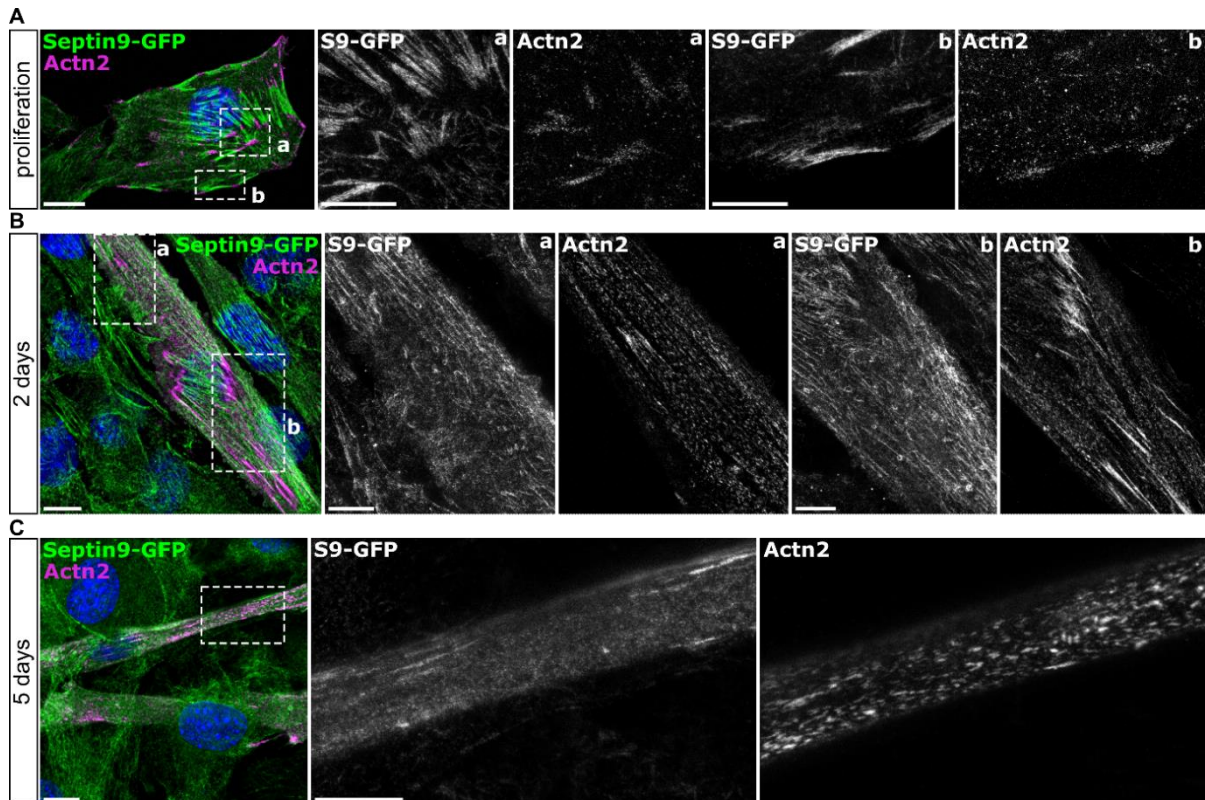

Figure S5 Septin9-GFP does not colocalize with  $\alpha$ -actinin-2 during *in vitro* myogenesis. Related to Figure 4.

**A** Confocal (merge) and STED (insets) fluorescent micrographs of proliferating Septin9-GFP knock-in myoblasts.  $\alpha$ -actinin-2 localizes to the focal adhesions and Septin9-GFP is excluded from these structures. **B** Representative images capture cytoskeletal reorganization in the nascent myotube after 2 days of differentiation. Septin9-GFP is no longer organized in long, straight filaments, but in short rods and rings, showing no colocalization with  $\alpha$ -actinin-2. **C** The mature myotube shows no colocalization between residual Septin9-GFP and  $\alpha$ -actinin-2, that resembles primitive sarcomeres. Scale bars 10  $\mu$ m, insets in cells 5  $\mu$ m.

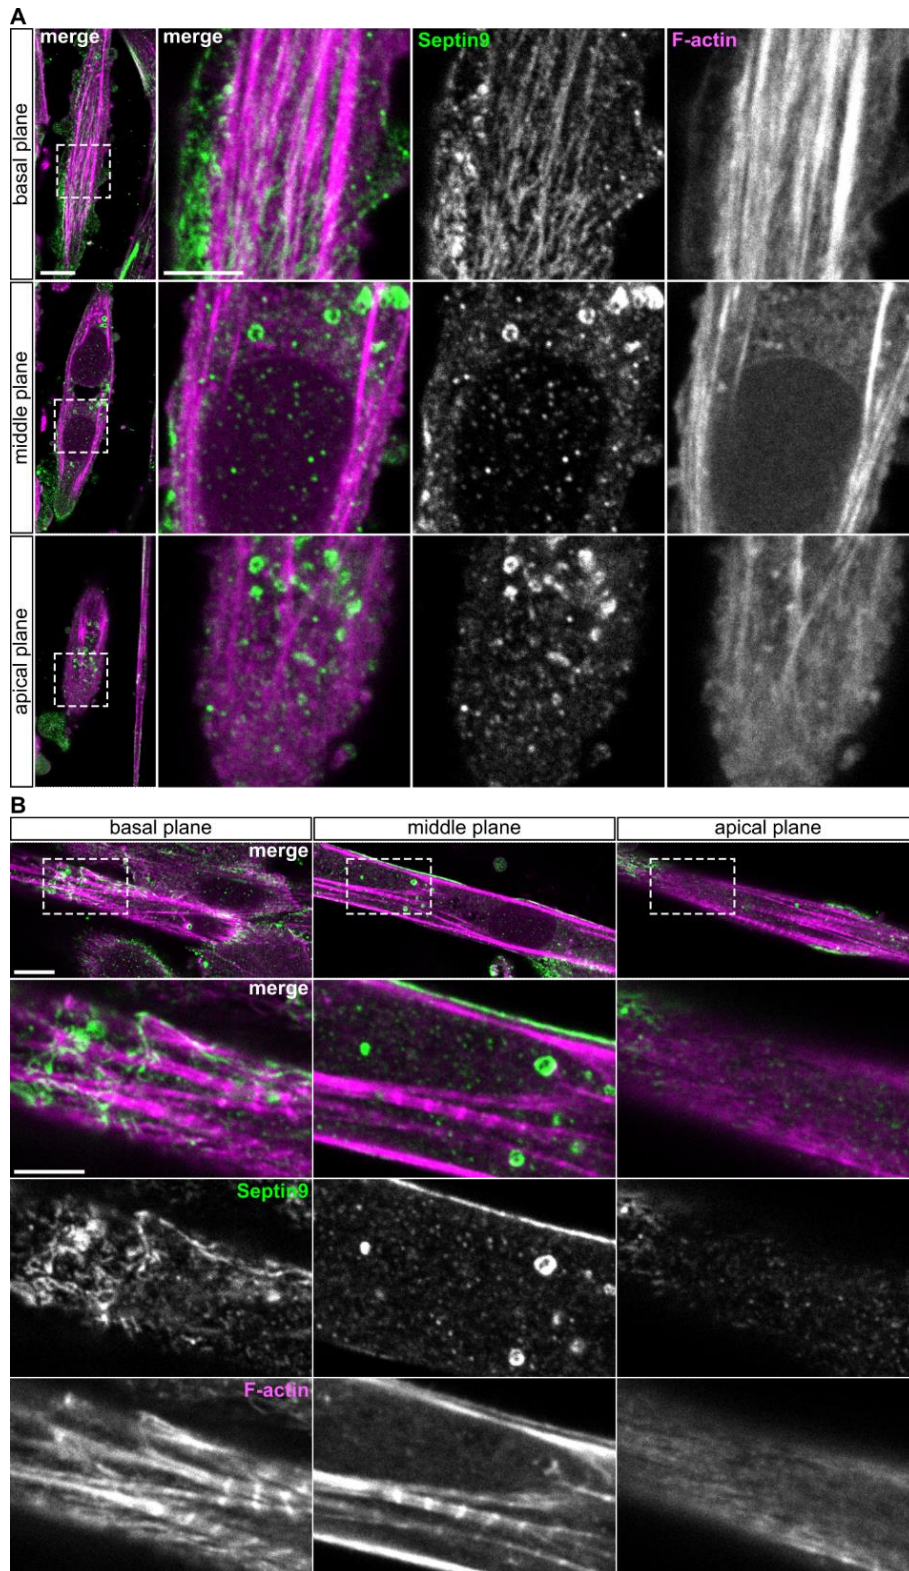

Figure S6 Sub-cellular distribution of native Septin9 in a myotube, Related to Figure 4.

Confocal images showing sub-cellular distribution of endogenous Septin9 after prolonged differentiation for 5 days. **A** Representative confocal images of a nascent myotube without apparent sarcomeric structures visualized with phalloidin. Increments in  $6\mu\text{m}$  steps at the bottom, middle ( $6\mu\text{m}$ ) and upper ( $12\mu\text{m}$ ) plane of the wild type C2C12 cells. **B** Representative confocal images of a mature myotube with sarcomeres visualized with phalloidin. The bottom, middle ( $5\mu\text{m}$ ) and upper ( $11\mu\text{m}$ ) plane in of the wild type C2C12 cells. Magnified insets show Septin9 and Actin (phalloidin) organization in the boxed area of the myotube. Scale bar  $10\mu\text{m}$ , inset  $5\mu\text{m}$ .

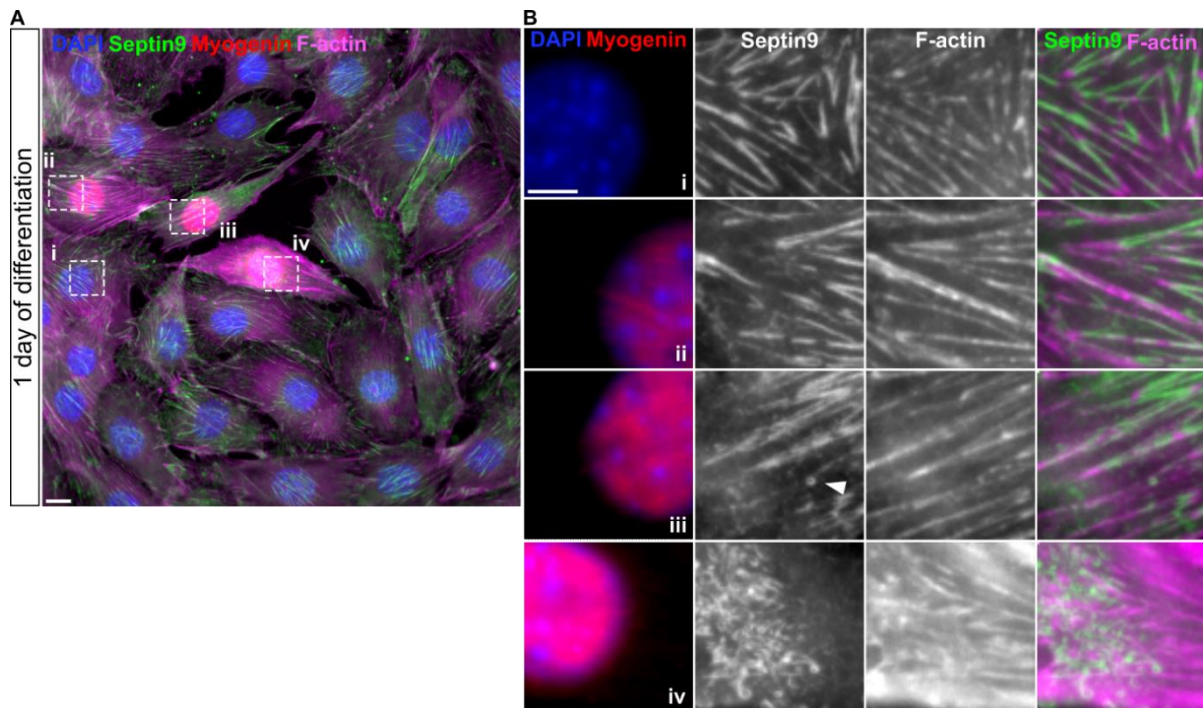

Figure S7 Septin9 reorganization is subsequent to Myogenin expression, Related to Figure 4.

**A** Representative epifluorescence image of wild type C2C12 cells differentiated for 1 day, visualizing Septin9, Myogenin and F-Actin via phalloidin. **B** Magnified insets from A show Septin9 organization in Myogenin-negative (inset i) and Myogenin positive cells (insets ii-iv). Myogenin-positive cells that display increased actin levels (inset iv) show the strongest Septin9 reorganization. White arrowhead shows a septin ring. Scale bar 10  $\mu\text{m}$ , inset 5  $\mu\text{m}$ .



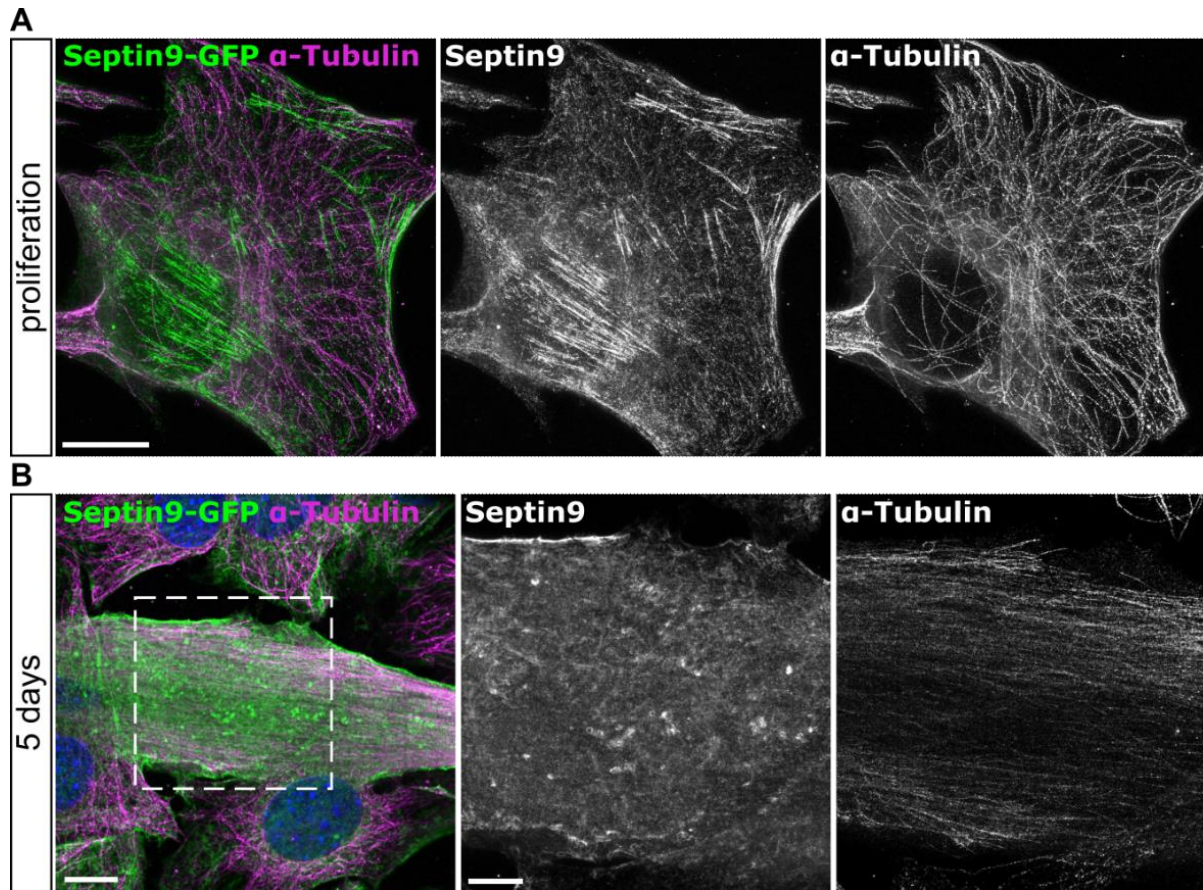

Figure S8 Microtubules in C2C12 cells are mostly devoid of Septin9, Related to Figure 4.

**A** Confocal (merge) and STED (insets) fluorescent micrographs of proliferating and differentiating for 5 days **B** Septin9-GFP knock-in myoblasts. Microtubules are visualized using  $\alpha$ -Tubulin antibody. Septin9 appears to colocalize only occasionally at the cell periphery. Scale bars 10  $\mu$ m, insets in cells 5  $\mu$ m.

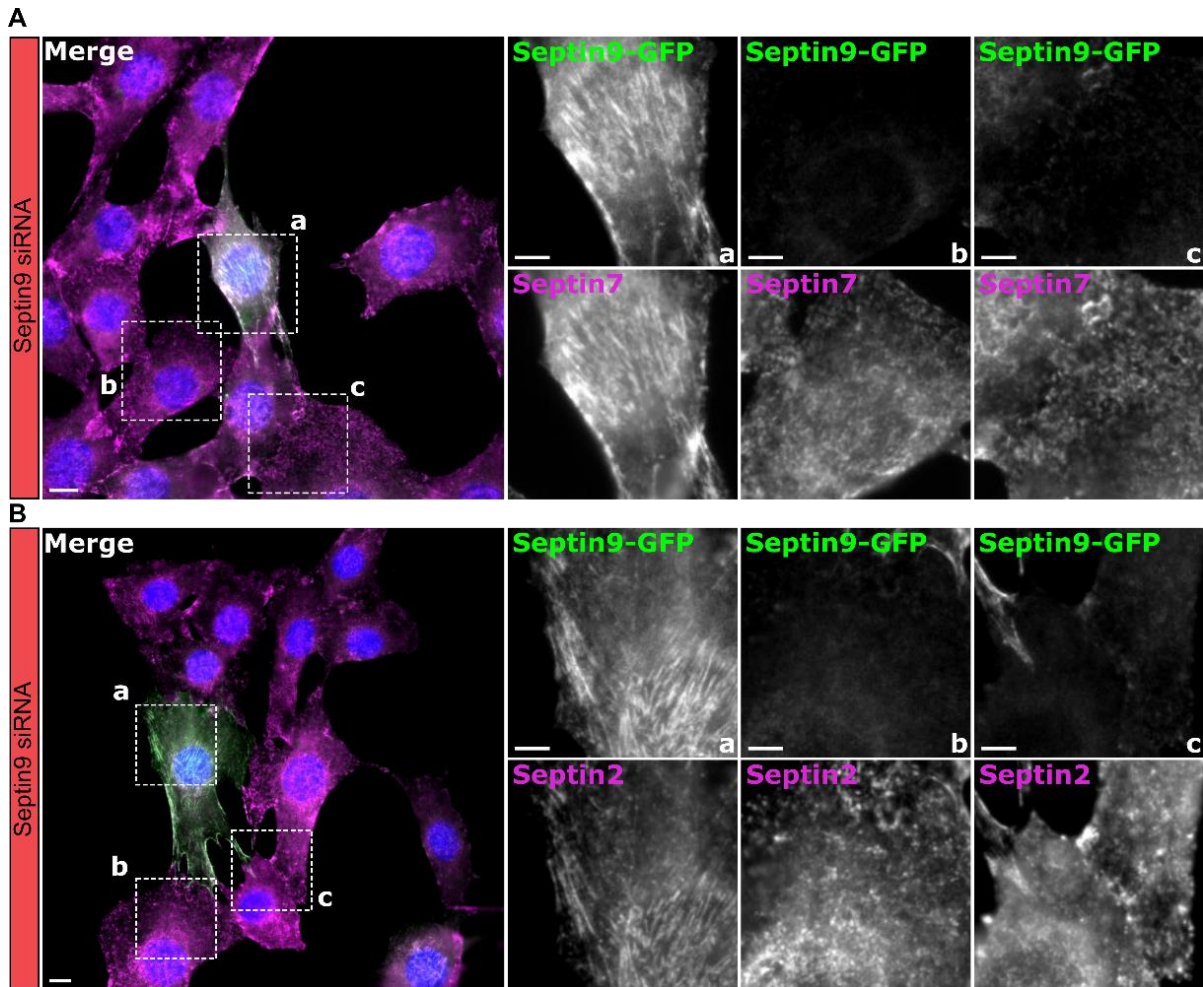

Figure S9 Integrity of septin filaments in absence of Septin9 in Septin9-GFP C2C12 cell line, Related to Figure 3.

**A-B** Representative epifluorescent images of proliferating Septin9-GFP clone#32 48 hours after siSeptin9 treatment visualizing Septin7 (**A**) and Septin2 (**B**). Septin9-GFP shows knock-in GFP signal, Septin7 and Septin2 are stained with antibodies. Scale bar 10  $\mu\text{m}$ , insets 5  $\mu\text{m}$ .

## Supplementary Tables

**Table S1 Primers for RT-qPCR, related to STAR Methods**

|                 | Forward                 | Reverse               |
|-----------------|-------------------------|-----------------------|
| <i>Myog</i>     | CCAAGGTCTCCTGTGCTGATG   | TTGGCAAAACCACACAATGC  |
| <i>Myh2</i>     | GGAGGCTGAGGAACAATCCA    | GTCATTCCACAGCATCGGGA  |
| <i>Myh8</i>     | AATGATGTTTCACAGCTGCAGAG | CCATCATGGCGGCATCAGTA  |
| <i>Rna18s1</i>  | CGGCTACCACATCCAAGGAA    | GCTGGAATTACCGCGGCT    |
| <i>Septin2</i>  | GCCTGTCATTGCGAAAGCTG    | GGGATACTGGCCTTGAGGAG  |
| <i>Septin4</i>  | CATCGTGGAAGTGGAAAACCC   | GACAGCAGGGATAGGGAAGTC |
| <i>Septin5</i>  | CAAGCAGTACGTTGGCTTCG    | GTTGATGCGTTCCTCAGCAC  |
| <i>Septin6</i>  | CCCACAGGACATTGCTTA      | AGGTGGGCATTCATGGTTCC  |
| <i>Septin7</i>  | GCCAACCTCCCAAATCAAGTG   | ACTTTGGATTGCTCCACCTGT |
| <i>Septin8</i>  | AGAGCGAGCTCCACAAGTTC    | CAAAGGCAGGTGTGCGTTC   |
| <i>Septin9</i>  | GGCTATGTGGGGATCGACTC    | CGGCTGATTTTGGACTTGAA  |
| <i>Septin10</i> | GAGATAAAAGAGCATCCCCGC   | AATCCAGTCTCCCCACAC    |
| <i>Septin11</i> | AGCCAGTGTGGTAAAGAGC     | GTTTCGCAGCTTTCATTAC   |
| <i>Wwtr1</i>    | TCCCCACAACCTCCAGAAGAC   | CAAAGTCCCGAGGTCAACAT  |
| <i>Fst</i>      | CTCTTCAAGTGGATGATTTTC   | ACAGTAGGCATTATTGGTCTG |

## Supplemental References

- [1] Oprescu, S.N., Yue, F., Qiu, J., Brito, L.F., and Kuang, S. (2020). Temporal Dynamics and Heterogeneity of Cell Populations during Skeletal Muscle Regeneration. *iScience* 23. <https://doi.org/10.1016/j.isci.2020.100993>.
